# Supplementary material for: A flexible self-poled piezoelectric nanogenerator based on a rGO–Ag/PVDF nanocomposite
Source: Royal Society of Chemistry journal article supplement (doi:10.1039/c8nj04751k), 2018-11-20
Supplement: c8nj04751k1.pdf [file c8nj04751k1.pdf]

## Flexible Self-poled Piezoelectric Nanogenerator Based on *r*GO-Ag/PVDF Nanocomposite

Manojit Pusty,<sup>a</sup> Lichchhavi Sinha,<sup>a</sup> and Parasharam M. Shirage<sup>a,b,\*</sup>

<sup>a</sup>Discipline of Metallurgy Engineering and Materials Science, Indian Institute of Technology Indore, Simrol, Indore 453552, India

<sup>b</sup>Discipline of Physics, Indian Institute of Technology Indore, Simrol, Indore 453552, India

\* Corresponding author E-mail: paras.shirage@gmail.com, pmsirage@iiti.ac.in.

Tel.: +91-787-5222-331

*Crystallinity Calculation from XRD Measurements:*

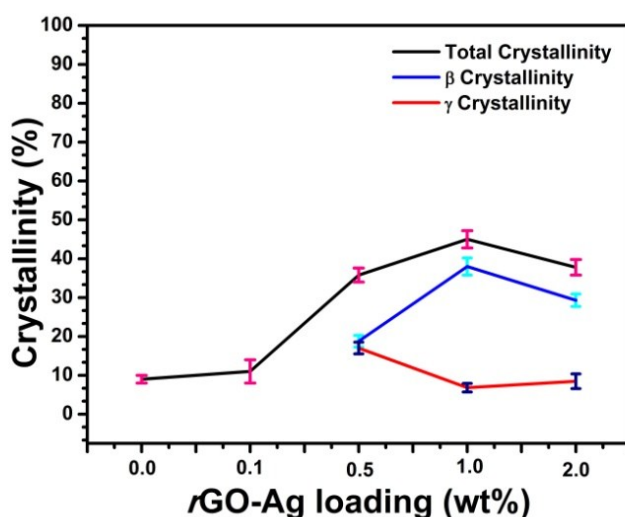

**Fig. S1** The variation of total crystallinity, β crystallinity, and γ crystallinity in different loadings of *r*GO-Ag/PVDF.

The total degree of crystallinity was calculated from equation S1, where  $\chi_{c_t}$  denotes total degree of crystallinity,  $A_{cr}$  is the integral area of the crystalline peaks and  $A_{amr}$  is the integral area of the amorphous peaks of PVDF.

$$\chi_{C_t} = \frac{\sum A_{cr}}{\sum A_{cr} + \sum A_{amr}} \times 100 \%$$

### Equation S1

The percentage of  $\beta$ -crystallinity is found from equation S2, where  $\chi_{C_t}$  is the total  $\beta$ -crystallinity,  $A_{\beta}$  is the integral area of the  $\beta$  crystalline peaks and  $A_{\gamma}$  is the integral area of the  $\gamma$  crystalline peaks. Similarly, the  $\gamma$  crystallinity is found from equation S3, where  $\chi_{C_t}$  indicates percentage of  $\gamma$ -crystallinity.

$$\chi_{C_{\beta}} = \chi_{C_t} \times \frac{\sum A_{\beta}}{\sum A_{\beta} + \sum A_{\gamma}} \%$$

### Equation S2

$$\chi_{C_{\gamma}} = \chi_{C_t} \times \frac{\sum A_{\gamma}}{\sum A_{\beta} + \sum A_{\gamma}} \%$$

### Equation S3

Calculation of relative proportion of electroactive polar phases:

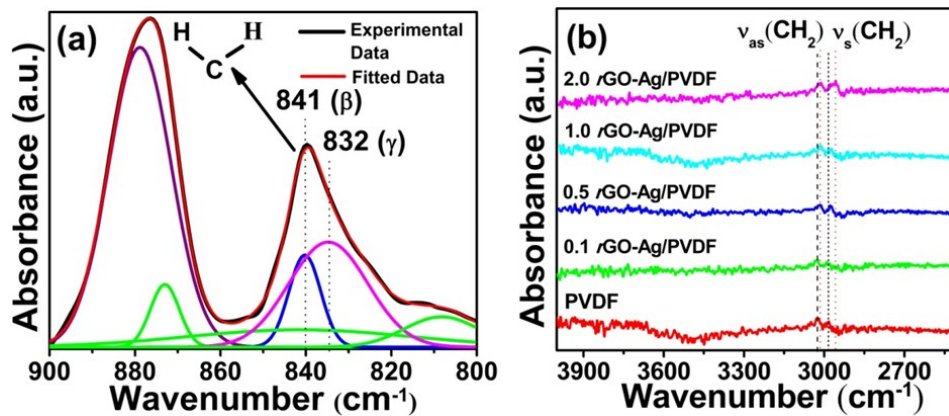

**Fig. S2** (a) The deconvoluted FT-IR spectra of 1.0 *r*GO-Ag/PVDF nanocomposite film in the region of 900-800  $\text{cm}^{-1}$  (b) the spectra of all the PVDF films in the region of 4000-2500  $\text{cm}^{-1}$ .

It can be noticed in Fig. S2 (a) from the deconvoluted FT-IR spectra that the peak at 841  $\text{cm}^{-1}$  which originates because of  $-\text{CH}_2-$  wagging vibrations belongs to the  $\beta$ - phase which exists beside the 832  $\text{cm}^{-1}$  peak belonging to the  $\gamma$  phase.

Fig. S2 (b) shows the FT-IR spectra between 4000  $\text{cm}^{-1}$  and 2500  $\text{cm}^{-1}$  where it can be seen that the two fundamental vibrational bands for  $\nu_{\text{as}}(-\text{CH}_2-)$  and  $\nu_{\text{s}}(-\text{CH}_2-)$  were shifted to a lower frequency region which indicates the presence of interfacial interaction between the surface charge of *r*GO-Ag and  $-\text{CH}_2/\text{CF}_2-$  dipoles of the PVDF based nanocomposite. These results confirm that *r*GO-Ag plays a vital role in the formation of the  $\gamma$ -phase. Electrostatic interaction of *r*GO-Ag with the  $-\text{CH}_2-/\text{CF}_2-$  dipoles present in PVDF plays a role in this phenomenon. The electrostatic interactions originate not only from the charges present at the surface due to Ag but also due to the delocalized  $\pi$  electrons along with the oxygen-containing functional groups present in *r*GO. The presence of the positive charges in *r*GO-Ag sheets leads to the interaction with  $-\text{CF}_2-$  dipoles of the PVDF segments which helps the formation and stabilization of the polar  $\beta$ - and  $\gamma$ -phase.

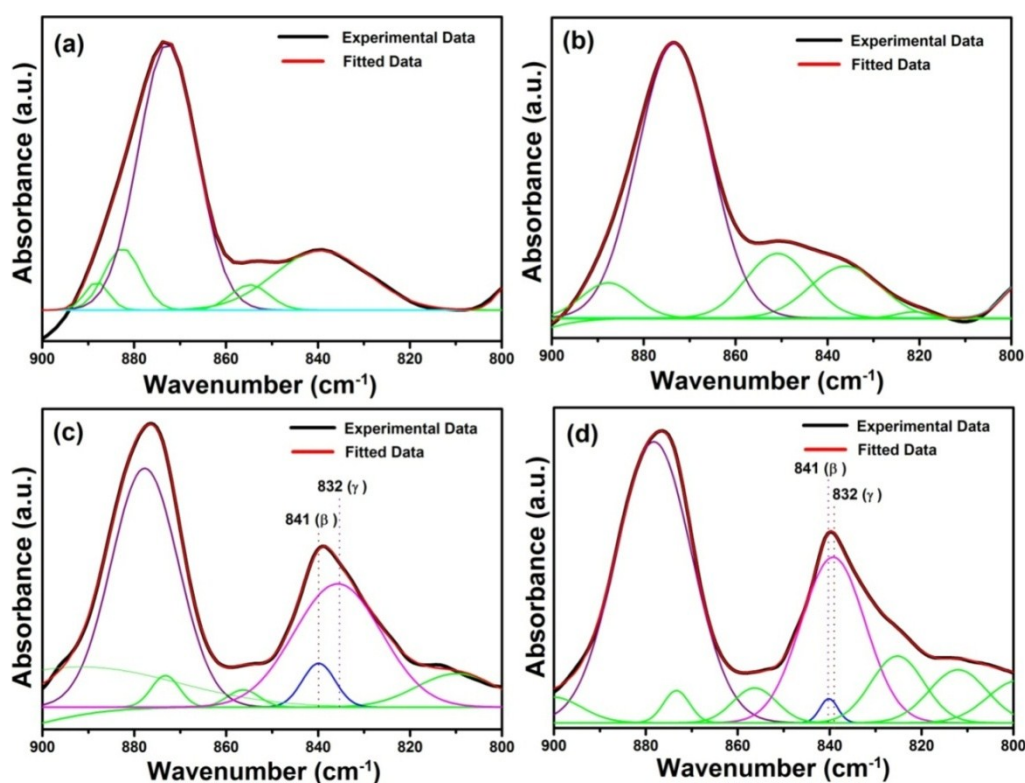

**Fig. S3** The Deconvoluted FT-IR spectra of (a) PVDF, (b) 0.1 *r*GO-Ag/PVDF, (c) 0.5 *r*GO-Ag/PVDF, (d) 2.0 *r*GO-Ag/PVDF.

The deconvoluted FT-IR spectra of PVDF, 0.1 *r*GO-Ag/PVDF, 0.5 *r*GO-Ag/PVDF, 2.0 *r*GO-Ag/PVDF are shown in Fig. S3a, b, c, d respectively. A shift in the deconvoluted peaks corresponding to the  $\beta$ - and  $\gamma$ -phase is observed in 0.5 and 2.0 *r*GO-Ag/PVDF, which can be attributed to the change in the interaction of *r*GO-Ag with PVDF chains as the filler loading increases.

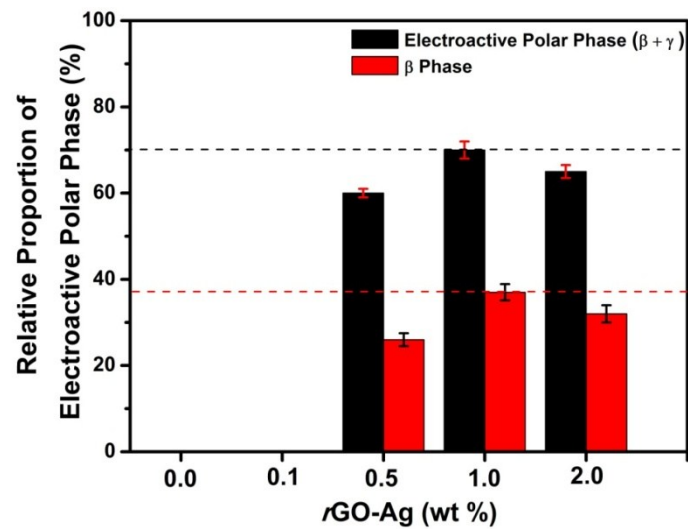

**Fig. S4** Variation of relative proportion in percentage of electroactive polar both  $\beta$ - and  $\gamma$ -phases (in black) and only  $\beta$ - phases (in red).

The relative proportion of polar electroactive phases (both  $\beta$  and  $\gamma$ ) denoted by  $F(\beta, \gamma)$  present in *r*GO-Ag/PVDF is calculated from the following equation:

$$F(\beta, \gamma) = \frac{A_{(841)}}{(K_{(841)}/K_{(832)})A_{(832)} + A_{(841)}}$$

**Equation S4**

where  $A_{841}$  and  $A_{832}$  is the absorption intensity at  $841\text{ cm}^{-1}$  and  $832\text{ cm}^{-1}$  respectively whereas  $K_{841}$  and  $K_{832}$  is the absorption coefficient at  $841\text{ cm}^{-1}$  and  $832\text{ cm}^{-1}$  respectively.

The relative proportion of individual presence of  $\beta$  phase is denoted by  $F_{\beta}$  and the individual presence of  $\gamma$  phase is denoted by  $F_{\gamma}$ .

$$F_{\beta} = F(\beta, \gamma) \times \frac{A_{\beta}}{A_{\beta} + A_{\gamma}} \times 100\% \quad \text{Equation S5}$$

S5

$$F_{\gamma} = F(\beta, \gamma) \times \frac{A_{\gamma}}{A_{\beta} + A_{\gamma}} \times 100\% \quad \text{Equation S6}$$

S6

where  $A_{\gamma}$  and  $A_{\beta}$  are the integrated areas under the  $\gamma$  and  $\beta$  deconvoluted curves.

The  $F(\beta, \gamma)$  was found to be 70 % whereas  $F_{\beta}$  was calculated to be 38 % in case of 1.0  $r\text{GO-Ag/PVDF}$  which was highest among all the  $r\text{GO-Ag/PVDF}$  nanocomposite loadings, which is shown in Figure S4.

$A_{841}$  and  $A_{832}$  are the absorption intensities at  $841\text{ cm}^{-1}$  and  $832\text{ cm}^{-1}$  respectively.  $K_{841}$  and  $K_{832}$  are the absorption coefficients at the respective wavenumbers.

*Measurement of Damping Coefficient:*

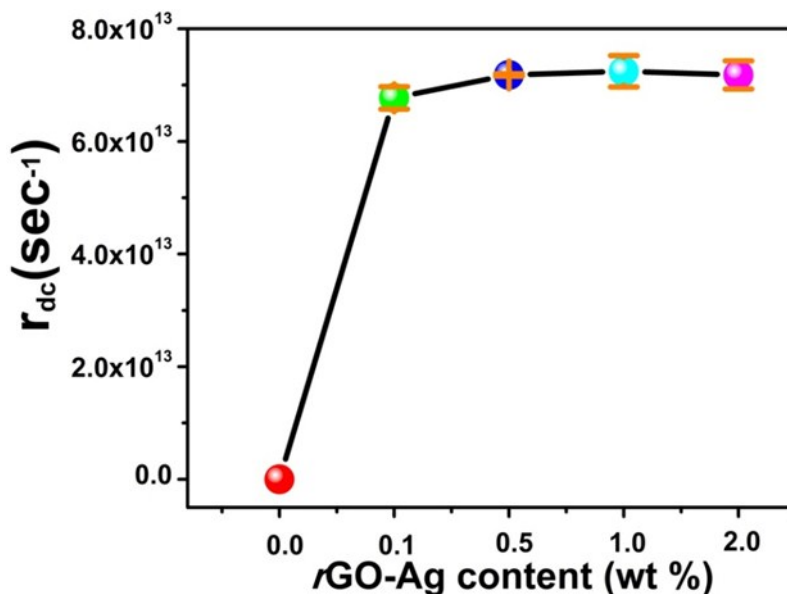

**Fig. S5** Variation of the damping coefficient with the increase in the filler concentration loading.

The variation of damping coefficient with the rise in the addition of *r*GO-Ag concentration is shown in Fig. S5. The damping coefficient is an important tool to ascertain the interaction between *r*GO-Ag nanosheets and PVDF chains. The asymmetric  $\nu_{as}(-CH_2-)$  and symmetric  $\nu_s(-CH_2-)$  stretching vibration bands of PVDF existing in the region between 3060 to 2940  $cm^{-1}$  do not overlap with other vibrational bands. However,  $\nu_{as}(-CH_2-)$  and  $\nu_s(-CH_2-)$  vibrational bands shift towards lower wavenumber with the increase in *r*GO-Ag filler concentration due to the damping oscillations of the  $-CH_2-$  dipoles, which is shown in Fig. S6. The overall mass of the  $-CH_2-$  dipoles of the PVDF increases because of the electrostatic interactions between the  $-CH_2-$  dipoles and surface charge of *r*GO-Ag. The damping coefficient increases with 1 weight percentage loading; however, it decreases slightly at 2 weight percentage *r*GO-Ag filler loading.

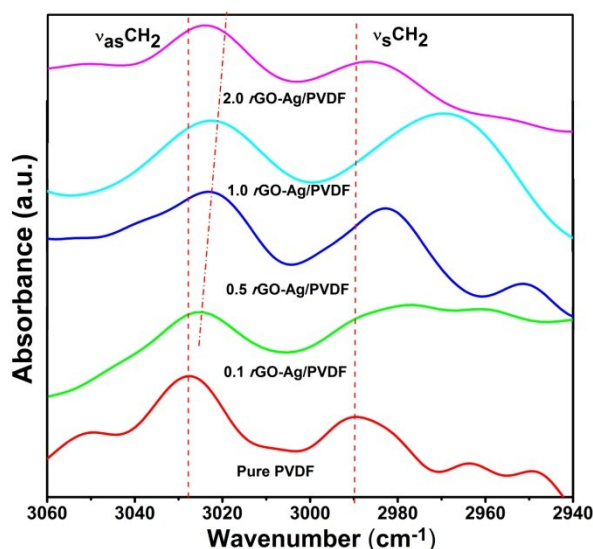

**Fig. S6** FT-IR spectra of the PVDF based nanocomposite with different *r*GO-Ag loadings in the region of 3060-2940  $cm^{-1}$ .

The damping coefficient ( $r_{dc}$ ) is calculated by using the following formula:

$$r_{dc} = 4\pi c \left( \bar{\nu}_{PVDF}^2 - \bar{\nu}_{rGO-Ag/PVDF}^2 \right)^{1/2} \quad \text{Equation}$$

S7

where  $c$  is the velocity of light,  $\bar{\nu}_{PVDF}^2$  is the wavenumber of damping free oscillation of the  $-\text{CH}_2-$  group in pure PVDF, whereas  $\bar{\nu}_{rGO-Ag/PVDF}^2$  is the damping originating from the  $-\text{CH}_2-$  groups in  $r\text{GO-Ag/PVDF}$  nanocomposite.

*Measurement of Dichroic Ratio:*

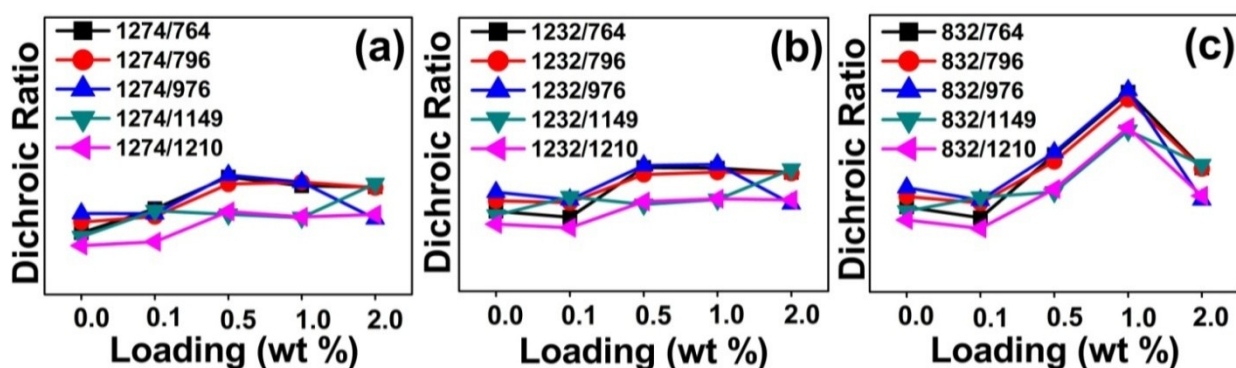

**Figure S7.** Dichroic ratio of the peak present at (a)  $1274 \text{ cm}^{-1}$  belonging to  $\beta$ -phase, (b)  $1232 \text{ cm}^{-1}$  belonging to  $\gamma$ -phase and (c)  $832 \text{ cm}^{-1}$  belonging to  $\gamma$ -phase.

The dichroic ratio is also another means to quantitatively analyze the crystal structures present in the nanocomposite films. The dichroic ratio is obtained by dividing the intensity of

crystalline polar phases with the intensities of all the  $\alpha$ -phase peaks present, in the FT-IR spectra, as shown in Fig. 2 in the main text. Fig. S7a shows the dichroic ratio obtained by dividing the intensity of the  $1274\text{ cm}^{-1}$  peak belonging to the crystalline  $\beta$ -phase with that of the intensities of all the  $\alpha$ -phase peaks present at  $764, 796, 976, 1149, 1210\text{ cm}^{-1}$ . Fig. S7b shows the dichroic ratio obtained by dividing the peak intensities of  $\gamma$ -phase present at  $1232\text{ cm}^{-1}$  with the intensities of all the  $\alpha$ -phase peaks present. Fig. S7c shows the dichroic ratio obtained between the intensity of the  $832\text{ cm}^{-1}$  peak belonging to polar electroactive phases (contributed by both  $\beta$ - and  $\gamma$ -phases), as shown in the peak deconvolution in Fig. S2a and intensities of all the  $\alpha$ -phase peaks. The relative amount of the electroactive polar phases increases till 1 weight percentage filler loading. This indicates that the addition of *r*GO-Ag contributes in inducing the electroactive polar phases in PVDF. However, the dichroic ratio falls at 2 weight percentage of *r*GO-Ag filler loading. These results indicate firmly that the content of *r*GO-Ag contributes to the process of transformation of  $\alpha$ -phase to polar ( $\beta$ - and  $\gamma$ -) electroactive phases. It is noteworthy here that in this work the variation of the dichroic ratio is observed without any external mechanical or electrical treatment to the PVDF nanocomposite films. [S1]

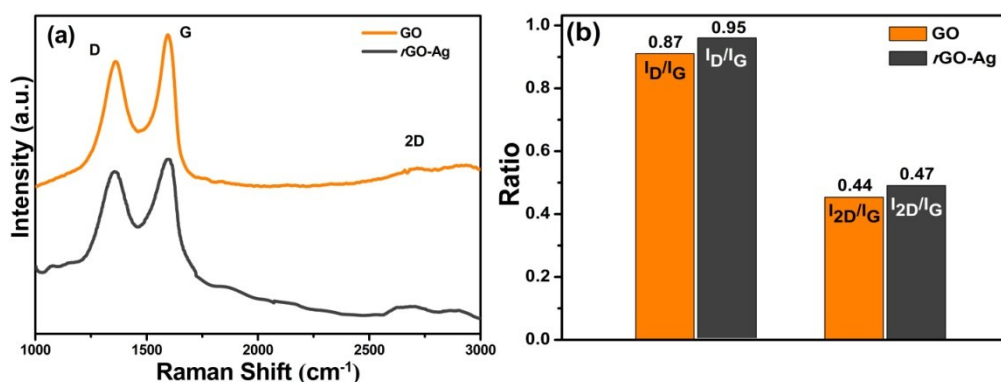

**Fig. S8** Raman Spectra of (a) GO and *r*GO-Ag, (b)  $I_D/I_G$  and  $I_{2D}/I_G$  ratio of GO and *r*GO-Ag.

The Raman Spectra of GO and *r*GO-Ag is shown in Fig. S8a. In case of GO, the D band is located at  $1361\text{ cm}^{-1}$  and is related to the size of the in-plane  $sp^2$  domains. The G band is located near  $1596\text{ cm}^{-1}$  which originate from the first order scattering of the  $E_{2g}$  phonons of



the  $sp^2$ -hybridized carbon atoms. The 2D band originates at  $2700\text{ cm}^{-1}$  which is sensitive to the stacking of graphene sheets. The D band of  $rGO-Ag$  is located at  $1356\text{ cm}^{-1}$ , the G band is located at  $1600\text{ cm}^{-1}$  and the 2D band is located at  $2682\text{ cm}^{-1}$ . The  $I_D/I_G$  and the  $I_{2D}/I_G$  ratio is shown in Fig. S8b. The  $I_D/I_G$  peak intensity ratio is a measure of the  $sp^2$  domain size of graphene sheets containing  $sp^3$  and  $sp^2$  bonds and is inversely proportional to the average size of the  $sp^2$  clusters. The  $I_D/I_G$  peak ratio of GO and  $rGO-Ag$  is 0.87 and 0.95 respectively. The  $I_D/I_G$  peak ratio in case of  $rGO-Ag$  increases, which indicates a reduction in the size of the  $sp^2$  clusters in the reduction process. The  $I_{2D}/I_G$  peak ratio indicates the number of layers of graphene sheets present. The 2D/G ratio in case of GO and  $rGO-Ag$  is 0.44 and 0.47 respectively. It is reported that the ratio between the  $I_{2D}/I_G$  of single, double, triple and multi ( $>4$ ) layered graphene sheets are typically greater than 1.6,  $\sim 0.8$ ,  $\sim 0.30$ , and  $\sim 0.07$  respectively. [S2] This indicates that triple layer graphene sheets are present in both GO and  $rGO-Ag$ . This result also concludes that during the reduction process of GO to  $rGO-Ag$  no significant amount of stacking of graphene sheets occurs.

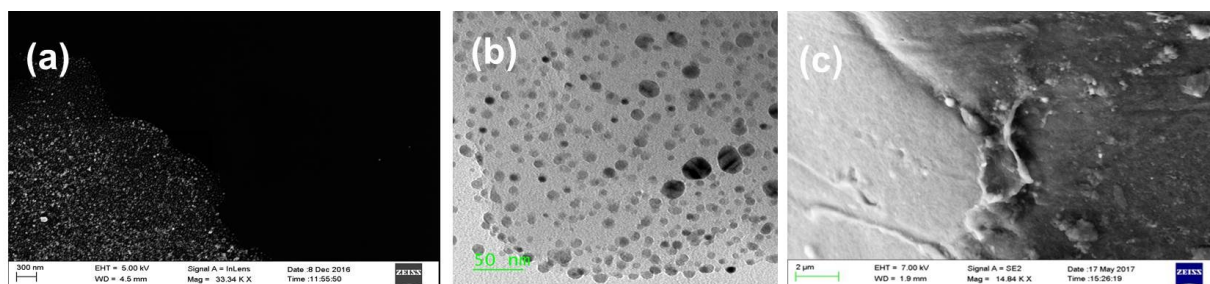

**Fig. S9** (a) SEM image and (b) HRTEM image of  $rGO-Ag$  showing Ag nanoparticles embedded in a thin layer of  $rGO$  matrix, (c) SEM image of the surface morphology of 1.0  $rGO-Ag/PVDF$  nanocomposite.

The Field emission scanning electron microscopy (FE-SEM) image of the  $rGO-Ag$  nanocomposite is shown in Fig. S9a which shows the presence of layer-like  $rGO$ , within

which silver nanoparticles are evenly dispersed. From the transmission electron microscopy (TEM) image as shown in Fig. S9b the average particle size of the silver nanoparticles (Ag-NP) can be calculated to be between  $\approx 20$  and  $\approx 30$  nm. The Ag NPs are evenly dispersed in the *r*GO matrix and contributes in the creation of conduction paths to bring the piezoelectric charges to the electrodes present in the top and the bottom electrodes which in turn increases the sensitivity of the nanocomposite.

Field Emission-Scanning Electron Microscopy was also conducted on the surface of 1.0 *r*GO-Ag/PVDF nanocomposite film to study the surface morphology. Fig. S9c shows wrinkled and crumbled morphology of the graphene sheets which are encapsulated by the PVDF polymer matrix. The encapsulation of the graphene sheets by the polymer visually confirms the bonding interactions between the polymer and the nanofiller.

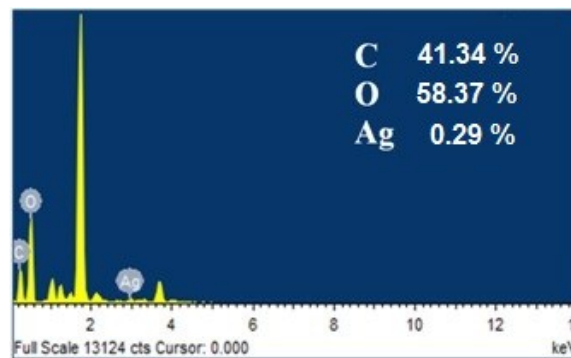

**Fig. S10** EDS spectra of *r*GO-Ag, under HR-TEM study.

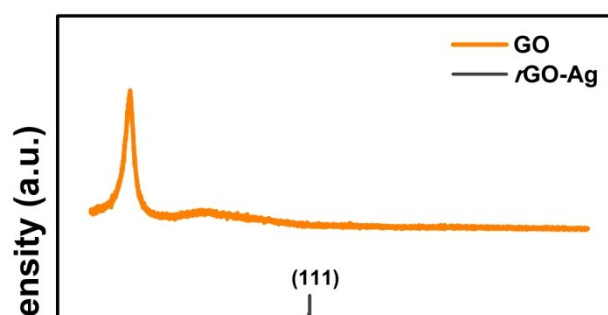

**Fig. S11** XRD spectra of GO and *r*GO-Ag.

In the XRD spectra of *r*GO-Ag is shown in Fig. S11, a small hump at  $25^\circ$  indicates the exfoliation of Graphene layers from GO to form reduced graphene oxide. Also the peaks at  $38.1^\circ$ ,  $44.2^\circ$ ,  $64.3^\circ$ ,  $77.3^\circ$  belongs to (111), (200), (220), (311) lattice planes of Ag nanoparticles belonging to the face-centred cubic structure.<sup>[S3]</sup>

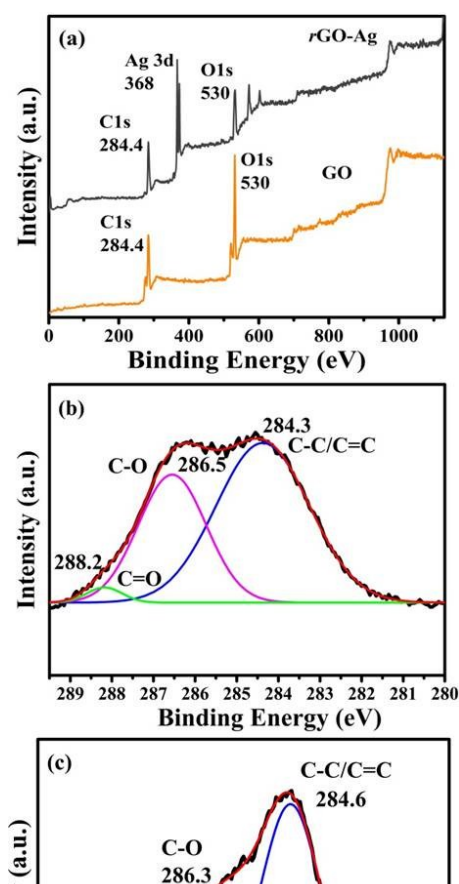

**Fig. S12** (a) XPS Survey Spectra of GO and *r*GO-Ag, (b) C1s spectra of GO and (c) C1s spectra of *r*GO-Ag.

Fig. S12 (a) shows the XPS survey spectra of GO and *r*GO-Ag. The peak at 368 eV in the survey spectra of *r*GO-Ag belongs to Ag, which confirms the presence of metallic Ag in *r*GO-Ag. Fig. S12 (b) shows the C1s spectra of GO, where the peaks indicate the presence of C=C, C-O, C=O functional groups present in graphene oxide. Fig. S12 (c) shows the C1s spectra of *r*GO-Ag where a reduction in the intensity of the peaks of C-O and C=O is evident, which indicates the reduction of graphene oxide in the process of the formation of *r*GO-Ag.

*Polarization-Electric Field Characterization:*

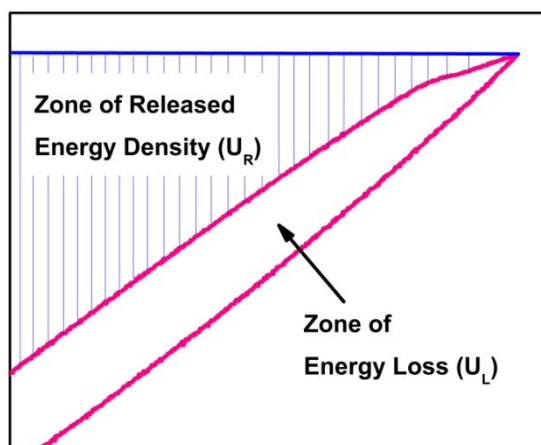

**Fig. S13** Shaded area (blue bars) shows the zone of Released Energy Density ( $U_R$ ) whereas area inside the PE-loop shows the zone of Energy Loss ( $U_L$ ).

To calculate the efficiency of the nanocomposites the area under the zone of Released Energy Density ( $U_R$ ) and the area under the zone of Energy Loss is calculated ( $U_L$ ).

*Electrical Characterizations:*

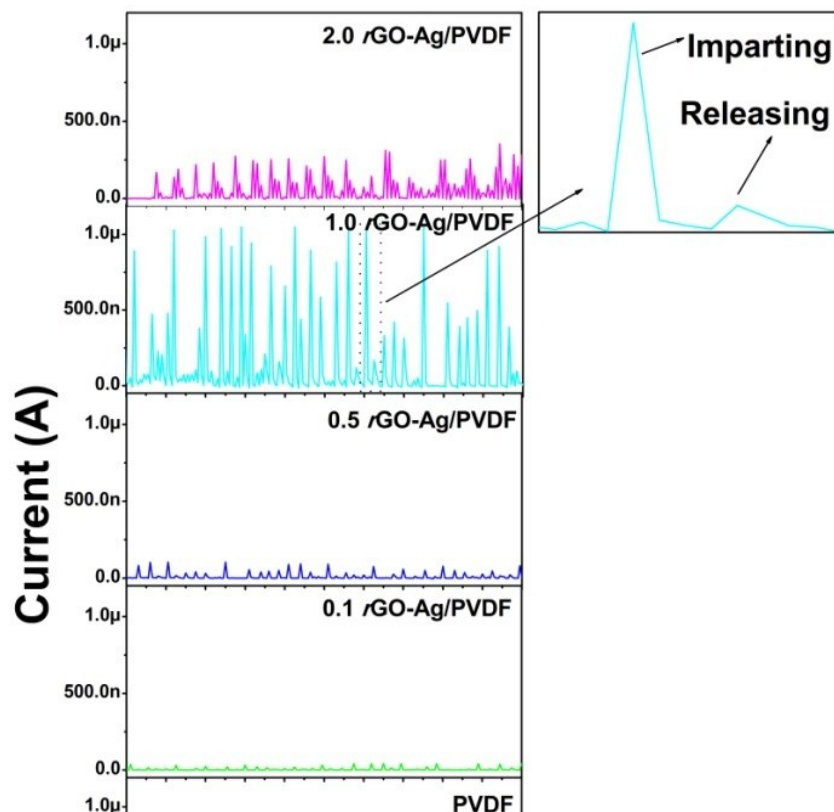

**Fig. S14.** The (a) rectified short-circuit current generated by the 2.0 *r*GO-Ag/PVDF, 1.0 *r*GO-Ag/PVDF, 0.5 *r*GO-Ag/PVDF, 0.1 *r*GO-Ag/PVDF, PVDF nanocomposite films upon human palm impulse imparting, (b) magnified image of one cycle of current response due to human palm impulse imparting and releasing action.

The rectified short-circuit current generated by the different loadings of *r*GO-Ag/PVDF nanocomposites are shown in Fig. S14a. The current detected from the 1.0 *r*GO-Ag/PVDF nanocomposite reached a maximum value of  $\sim 1.05 \mu\text{A}$ , whereas the current from the pure PVDF nanocomposite reached a maximum value of  $\sim 0.023 \mu\text{A}$ . It can be concluded that there is an increasing trend of current till 1 percentage weight loading of *r*GO-Ag, thereafter at 2 percentage weight loading it decreased. Fig. S14b shows the magnified view of a single cycle of the rectified short-circuit current.

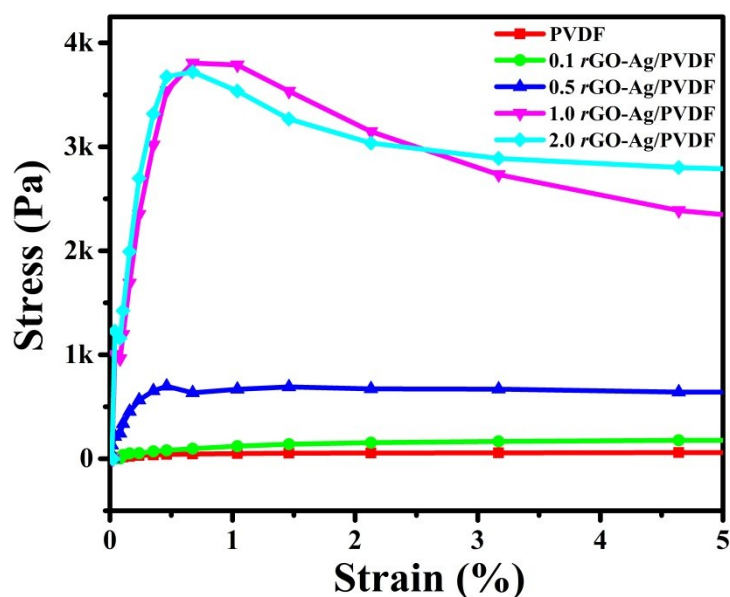

**Fig. S15** Shows the Stress vs Strain curve of the *r*GO-Ag/PVDF nanocomposite with different filler loadings.

The Stress vs Strain curve for all the nanocomposites are shown in Fig. S15. The Young's Modulus of the 1.0 *r*GO-Ag/PVDF nanocomposite is found out to be 7.533 kPa, from the Stress vs Strain Curve.

#### *Calculation of Imparted Pressure ( $\sigma$ )*

The pressure imparted on the HPNG is calculated from the following equations:

$$m \cdot g \cdot h = \frac{1}{2} m \cdot v^2 \quad \text{Equation S8}$$

$$(F - m \cdot g) \cdot \Delta t = m \cdot v \quad \text{Equation S9}$$

$$\sigma = \frac{F}{S} \quad \text{Equation S10}$$

Where  $m$  is the mass (the magnitude of mass shown in digital weigh balance by human palm striking which is equal to 0.400 kilograms),  $g = 9.8$  N/kg,  $h = 0.3$  m,  $\Delta t = 0.528$  s (which is the average time between two voltage spikes),  $F$  is the force applied on the HPNG,  $\sigma$  is the stress applied on the PNG,  $S$  is the surface area of the electrodes.

The force applied on the HPNG was found out to be  $\approx 6$  N, and applied stress  $\sigma \approx 4.6$  kPa.

#### *Energy Efficiency Calculation*

The energy harvesting efficiency of the PNG during capacitor charging is given in Equation 7. The input energy ( $W_{in}$ ) provided to the PNG while charging the capacitor during one cycle is given by

$$W_{in} = F \times \Delta l = F \frac{\sigma l}{Y} = 36 \times 10^{-6} \text{ J} \quad \text{Equation S11}$$

Where  $F$  is (6 N) which is the applied force on 1.0 *r*GO-Ag/PVDF based PNG,  $\Delta l$  is the deformation of the PNG when stress  $\sigma$  (4.6 kPa) is applied and  $Y$  is the Young's Modulus

(7.533 kPa) of the nanocomposite and the average thickness of the nanocomposite film  $l$  is 0.01 mm.

The total input mechanical energy transfer to the PNG during the capacitor charging is given by

$$E_{in} = \frac{t}{\Delta t} W_{in} = 0.0375 \text{ J} \quad \text{Equation S12}$$

where  $t$  is the total time required to charge the capacitor, which is 550 s.  $\Delta t$  is the average time duration between the two consecutive voltage peaks of the imparting pressure cycles, which is 0.528 s.

$$E_{out} = \frac{1}{2} CV^2 = 245 \times 10^{-6} \text{ J} \quad \text{Equation S13}$$

The overall energy efficiency ( $\eta$ ) can be found out from the ratio of the electrical energy stored ( $E_{out} = \frac{1}{2} CV^2$ ) in the 10  $\mu\text{f}$  capacitor while charging and the total mechanical energy used ( $E_{in}$ ) to charge the 10  $\mu\text{f}$  capacitor.

$$\eta = \frac{E_{out}}{E_{in}} \times 100 \% = 0.65 \% \quad \text{Equation S14}$$

**Table S1:** Performance details of previously reported data on energy harvesting devices

| Sl. No. | Name of the Piezoelectric Device | Poling Voltage and Duration | Input Source    | Voltage (V) | Current (I)        |
|---------|----------------------------------|-----------------------------|-----------------|-------------|--------------------|
| 1       | Cellulose-ZnO <sup>[S4]</sup>    | Data                        | Ultrasonic bath | 80 mV       | 1.25 $\mu\text{A}$ |



|    |                                                   |                          |                                     |        |                       |
|----|---------------------------------------------------|--------------------------|-------------------------------------|--------|-----------------------|
|    |                                                   | Unavailable              |                                     |        |                       |
| 2  | ZnO NWs/PVDF <sup>[S5]</sup>                      | 100 kV/mm                | Linear motor                        | 0.2 V  | 10 nA/cm <sup>2</sup> |
| 3  | Li doped ZnO NW-Polymer Composite <sup>[S6]</sup> | 105 kV/cm;<br>20 h       | Bending stage                       | 180 V  | 50 $\mu$ A            |
| 4  | BaTiO <sub>3</sub> NPs <sup>[S7]</sup>            | 100 kV/cm;<br>20 h       | Bending stage                       | 3.2V   | 350 nA                |
| 5  | ZnSnO <sub>3</sub> <sup>[S8]</sup>                | Not Found                | Human finger press                  | 40 V   | 0.4 $\mu$ A           |
| 6  | KNbO <sub>3</sub> Nanorod <sup>[S9]</sup>         | 150 kV; 1h               | Linear motor                        | 3.2 V  | 67.5 nA               |
| 7  | KNbO <sub>3</sub> Nanowires <sup>[S10]</sup>      | 5.0 kV/mm;<br>1 h        | Bending tester                      | 10.5 V | 1.3 $\mu$ A           |
| 8  | BaTiO <sub>3</sub> Nanotubes <sup>[S11]</sup>     | 80 kV/cm;<br>12 h        | Linear motor                        | 5.5 V  | 350 nA                |
| 9  | KNN-LTS <sup>[S12]</sup>                          | 2 KV/mm;<br>24 h         | Mechanical tapping                  | 53 V   | 15 $\mu$ A            |
| 10 | Native Cellulose microfiber <sup>[S13]</sup>      | Not Poled                | Human hand punching                 | 30 V   | 500 nA                |
| 11 | PVDF/AlO-rGO <sup>[S14]</sup>                     | Not Poled                | Human hand punching                 | 36 V   | 0.8 $\mu$ A           |
| 12 | BCTZ NPs–polymer composite <sup>[S15]</sup>       | 1.5 kV: Data Unavailable | Bending stage                       | 15 V   | 0.8 $\mu$ A           |
| 13 | PVDF-TrFE Film/Graphene Oxide <sup>[S16]</sup>    | 30 MV/m,<br>1 h          | Hydraulic/Mechanical fatigue tester | 4.3 V  | 1.88 $\mu$ A          |
| 14 | GAg/PVDF <sup>[S17]</sup>                         | Not Poled                | Mechanical stepper machine          | 100mV  | 0.1 nA                |
| 15 | Fe-RGO/PVDF <sup>[S18]</sup>                      | Not Poled                | Human hand punching                 | 5.1 V  | 0.254 $\mu$ A         |
| 16 | Fe-RGO/PVDF <sup>[S19]</sup>                      | Not Poled                | Human Finger Tapping                | 1.2 V  | 342 nA                |
| 17 | CNT/PVDF <sup>[S19]</sup>                         | Not Poled                | Human Finger Tapping                | 2.5 V  | 680 nA                |
| 18 | rGO-Ag/PVDF (Present Work)                        | Not Poled                | Human hand punching                 | 18 V   | 1.05 $\mu$ A          |

## References

- S1. Alamusi, J. M. Xue, L. K. Wu, N. Hu, J. Qiu, C. Chang, S. Atobe, H. Fukunaga, T. Watanabe, Y. L. Liu, H. M. Ning, J. H. Li, Y. Li and Y. Zhao, *Nanoscale*, 2012, **4**, 7250-7255.
- S2. O. Akhavan, *Carbon*, 2015, **81**, 158-166.
- S3. M. Pusty, A. K. Rana, Y. Kumar, V. Sathe, S. Sen and P. Shirage, *ChemistrySelect*, 2016, **1(14)**, 4235-4245.
- S4. A. Kumar, H. Gullapalli, K. Balakrishnan, A. B. Mendez, R. Vajtai, M. Terrones and P. M. Ajayan, *Small*, 2011, **7**, 2173-2178.
- S5. Q. Liao, Z. Zhang, X. Zhang, M. Mohr, Y. Zhang and H. J. Fecht, *Nano Research*, 2014, **7(6)**, 917-928.
- S6. S. H. Shin, Y. H. Kim, M. H. Lee, J. Y. Jung, J. H. Seol and J. Nah, *ACS Nano*, 2014, **8(10)**, 10844-10850.
- S7. K. I. Park, M. Lee, Y. Liu, S. Moon, G. T. Hwang, G. Zhu, J. E. Kim, S. O. Kim, D. K. Kim, Z. L. Wang and K. J. Lee, *Adv. Mater.*, 2012, **24**, 2999-3004.
- S8. M. M. Alam, S. K. Ghosh, A. Sultana and D. Mandal, *Nanotechnology*, 2015, **26**, 165403-165408.
- S9. J. H. Jung, C. Y. Chen, B. K. Yun, N. Lee, Y. Zhou, W. Jo, L. J. Chou and Z. L. Wang, *Nanotechnology*, 2012, **23**, 375401-375406.
- S10. M. R. Joung, H. Xu, I. T. Seo, D. H. Kim, J. Hur, S. Nahm, C. Y. Kang, S. J. Yoon and H. M. Park, *J. Mater. Chem. A*, 2014, **2**, 18547-18553.
- S11. Z. H. Lin, Y. Yang, J. M. Wu, Y. Liu, F. Zhang and Z. L. Wang, *J. Phys. Chem. Lett.*, 2012, **3**, 3599-3604.
- S12. Q. T. Xue, Z. Wang, H. Tian, Y. Huan, Q. Y. Xie, Y. Yang, D. Xie, C. Li, Y. Shu and X. H. Wang, *T. L. AIP Adv.*, 2015, **5**, 017102-017108.
- S13. M. M. Alam and D. Mandal, *ACS Appl. Mater. Interfaces*, 2016, **8**, 1555-1558.
- S14. S. K. Karan, R. Bera, S. Paria, A. K. Das, S. Maiti, A. Maitra and B. B. Khatua, *Adv. Energy Mater.*, 2016, **6**, 1601016-1601027.
- S15. C. Baek, J. H. Yun, J. E. Wang, C. K. Jeong, K. J. Lee, K. I. Park and D. K. Kim, *Nanoscale*, 2016, **8**, 17632-17638.
- S16. V. Bhavanasi, V. Kumar, K. Parida, J. Wang and P. S. Lee, *ACS Appl. Mater. Interfaces*, 2016, **8**, 521-529.
- S17. T. K. Sinha, S. K. Ghosh, R. Maiti, S. Jana, B. Adhikari, D. Mandal and S. K. Ray, *ACS Appl. Mater. Interfaces*, 2016, **8**, 14986-14993.
- S18. S. K. Karan, D. Mandal and B. B. Khatua, *Nanoscale*, 2015, **7**, 10655-10666.

S19. M. Pusty, A. Sharma, L. Sinha, A. Chaudhary and P. Shirage, *ChemistrySelect*, 2017, **2(9)**, 2774-2782.
